# Supplementary material for: Macromolecules with Different Charges, Lengths, and Coordination Groups for the Coprecipitation Synthesis of Magnetic Iron Oxide Nanoparticles as T1 MRI Contrast Agents
Source: PubMed Central journal article supplement (PMC6567071; doi:10.3390/nano9050699), 2019-05-05
Supplement: nanomaterials-09-00699-s001.pdf [file nanomaterials-09-00699-s001.pdf]

# Supplementary Materials: Macromolecules with Different Charges, Lengths, and Coordination Groups for Coprecipitation Synthesis of Magnetic Iron Oxide Nanoparticles as $T_1$ MRI Contrast Agents

Cheng Tao, Yanan Chen, Danli Wang, Yu Cai, Qiang Zheng, Lu An, Jiaomin Lin, Qiwei Tian and Shiping Yang

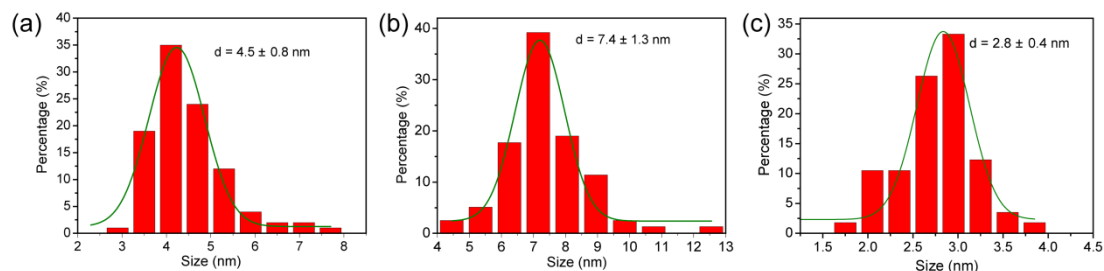

**Figure S1.** Particle size distribution of (a)  $\text{Fe}_3\text{O}_4$ -PAA, (b)  $\text{Fe}_3\text{O}_4$ -PAH and (c)  $\text{Fe}_3\text{O}_4$ -PVA acquired from the TEM images.

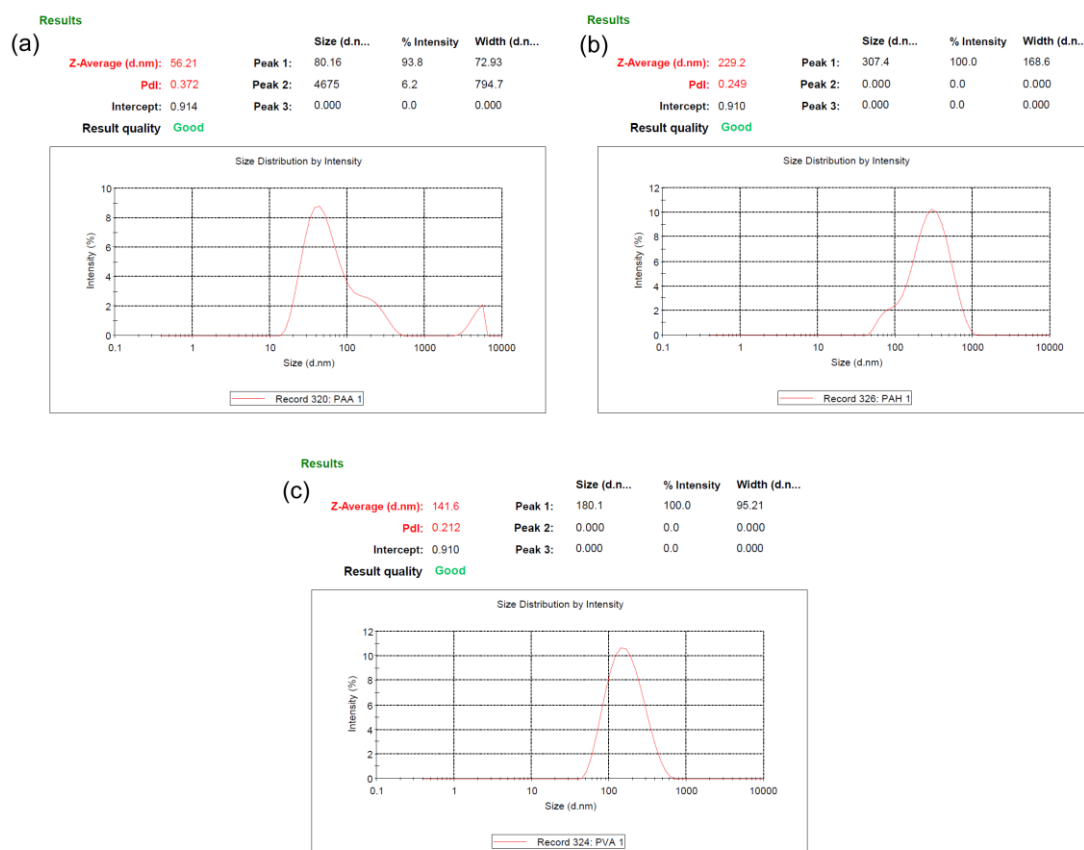

**Figure S2.** The hydrodynamic size profile of (a)  $\text{Fe}_3\text{O}_4$ -PAA, (b)  $\text{Fe}_3\text{O}_4$ -PAH and (c)  $\text{Fe}_3\text{O}_4$ -PVA nanoparticles in aqueous suspension.
